# Supplementary figures and images for: Comparing the Efficacy of MALDI-TOF MS and Sequencing-Based Identification Techniques (Sanger and NGS) to Monitor the Microbial Community of Irrigation Water
Source: MDPI journal article supplement (doi:10.3390/microorganisms11020287), 2023-01-21

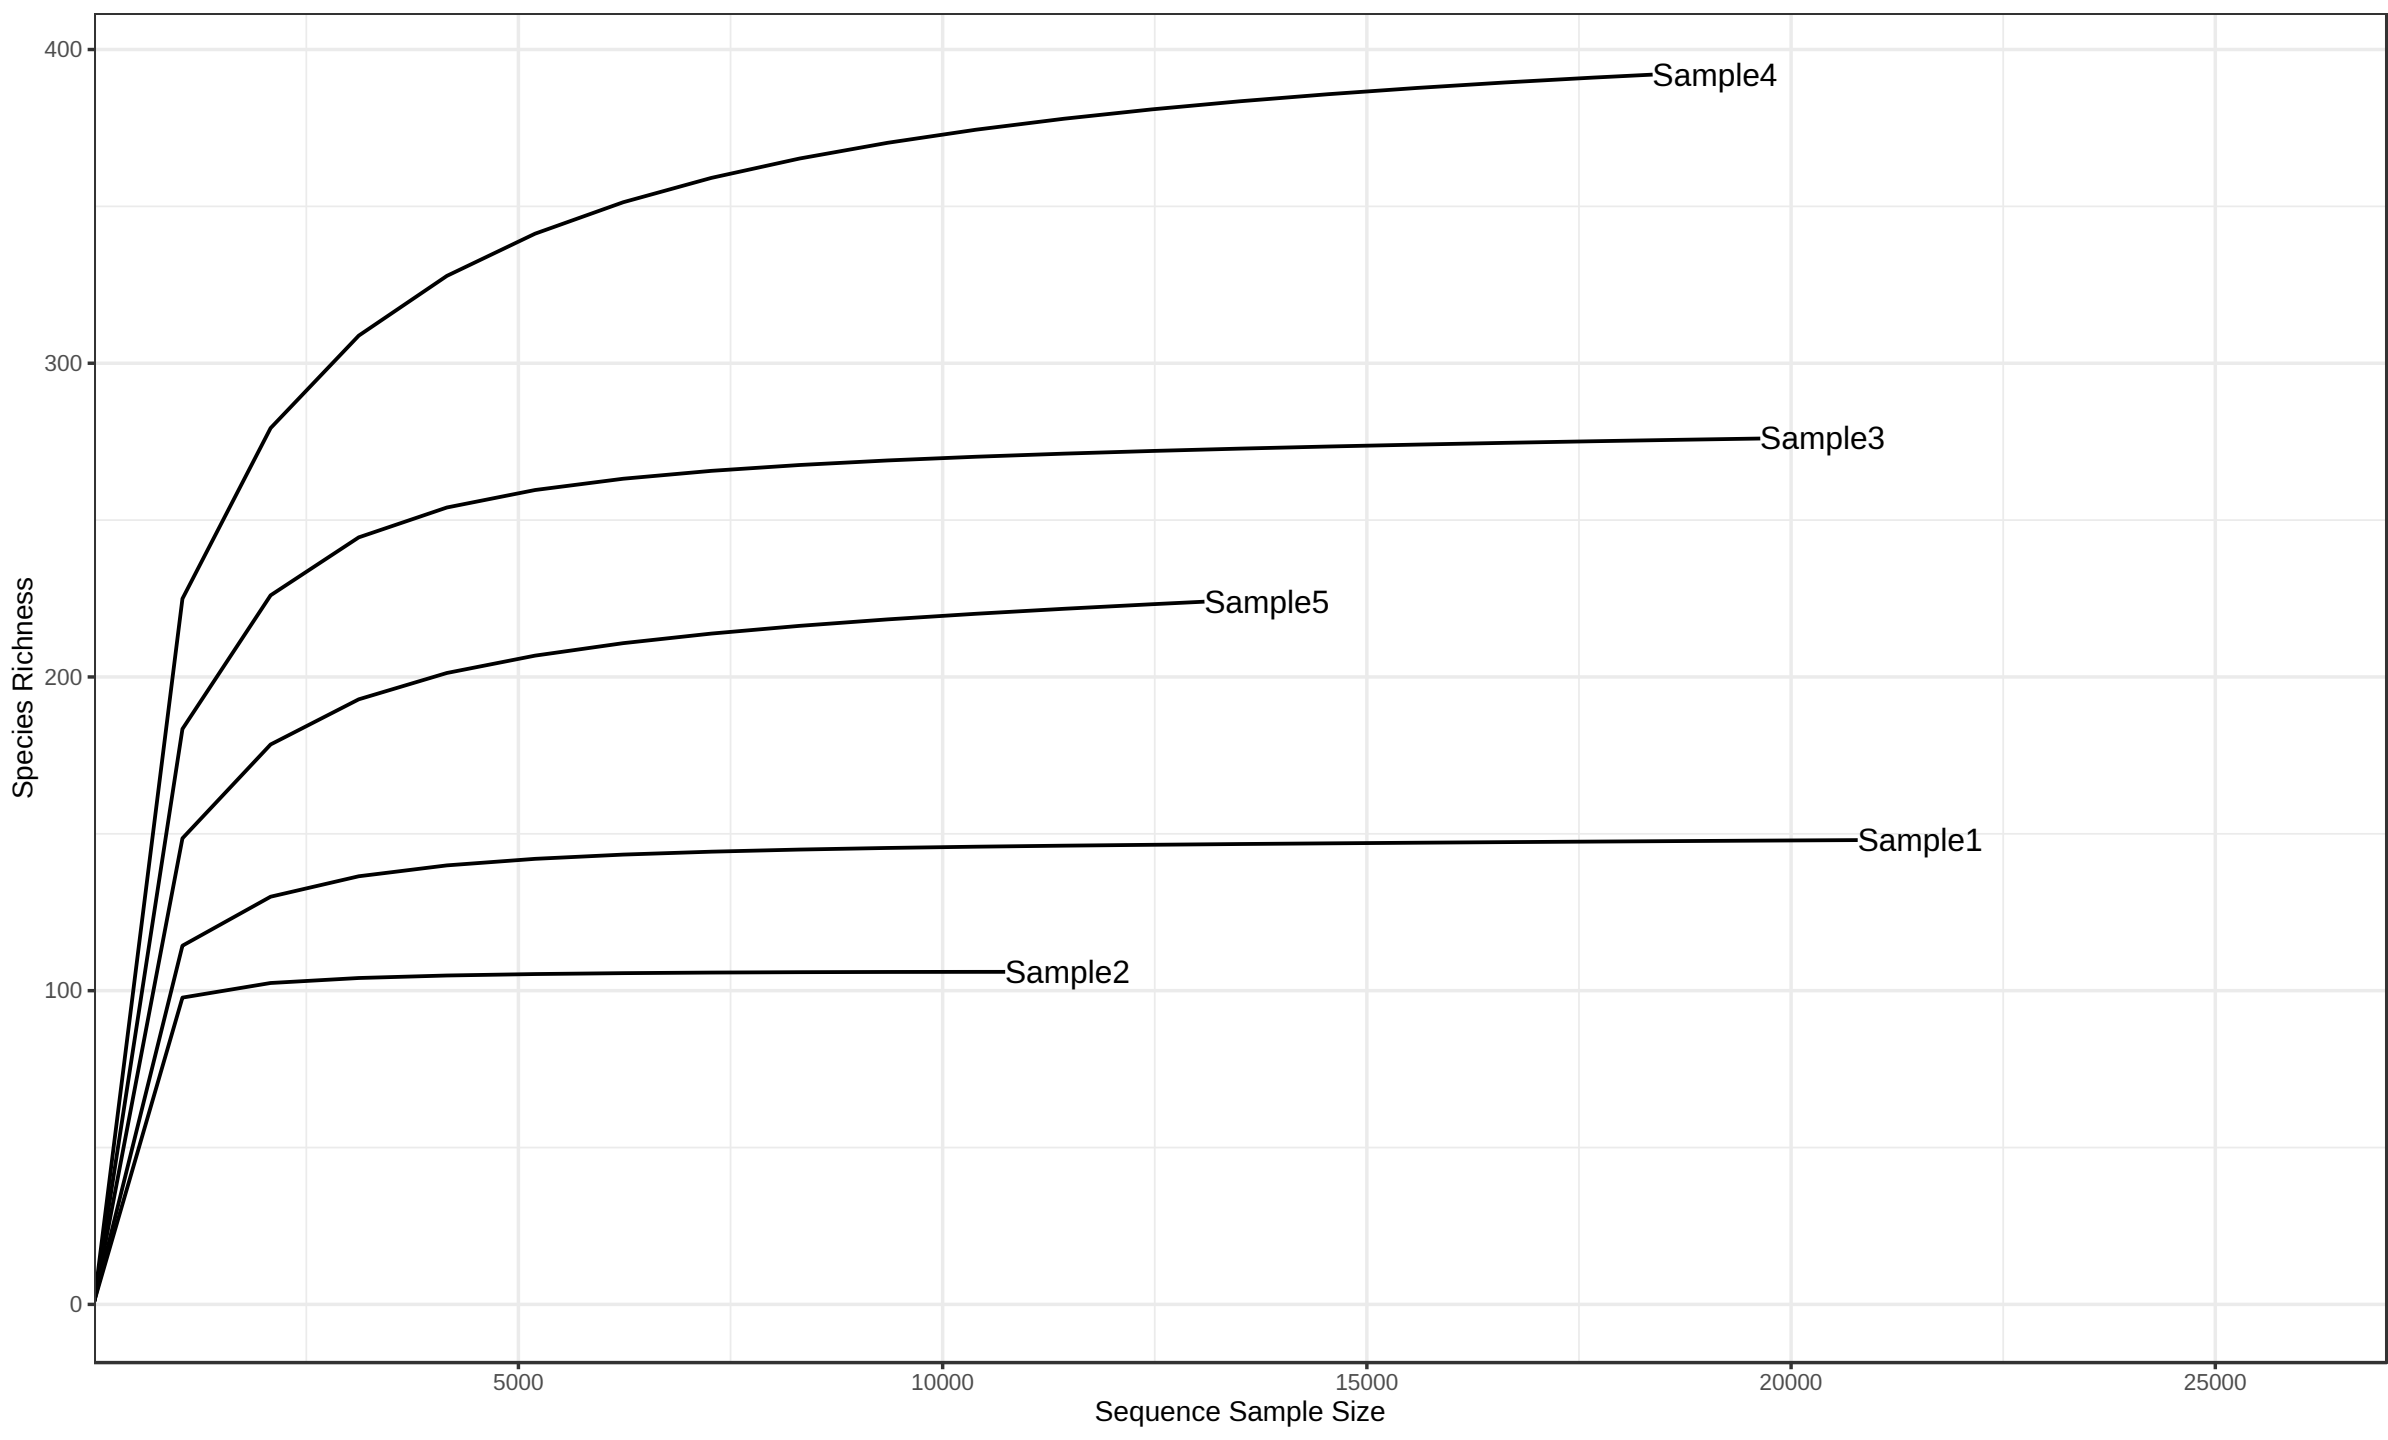

Supplement: s1 [file s1]
